# Supplementary material for: MaturePred: Efficient Identification of MicroRNAs within Novel Plant Pre-miRNAs
Source: PLoS One. 2011 Nov 16;6(11):e27422. doi: 10.1371/journal.pone.0027422 (PMC3217989; doi:10.1371/journal.pone.0027422)
Supplement: Table S1 — Feature combination in each prediction model, and average distance distribution of each model. (DOC) [file pone.0027422.s001.doc]

**Supplementary Table S1** Feature combination and average distance distribution of each model.

(a) Feature combination in per prediction model. F1={21 position-specific features of miRNAs}, F2={21 position-specific features of miRNA*s}, F3={24 position-specific features of flanking regions of miRNAs}, F4={24 position-specific features of flanking regions of miRNA*s}, F5={2 stability-related features: miRNA_5′end and miRNA*_5′end}, F6={1 distance-related feature: dis}, and F7={3 energy-related features: MFE1, MFE2, MFE3}. "****" means that the whole feature subset is selected. "*s*nt" (*s*∈{0,2,3,6,9,12}) represents that the features about the flanking regions of *s*nt are selected.

| Prediction model | No. of features | F1 | F2 | F3 | F4 | F5 | F6 | F7 |
| --- | --- | --- | --- | --- | --- | --- | --- | --- |
| *MaturePred0* | 48 | **** | **** | 0nt | 0nt | **** | **** | **** |
| *MaturePred2* | 56 | **** | **** | 2nt | 2nt | **** | **** | **** |
| *MaturePred3* | 60 | **** | **** | 3nt | 3nt | **** | **** | **** |
| *MaturePred6* | 72 | **** | **** | 6nt | 6nt | **** | **** | **** |
| *MaturePred9* | 84 | **** | **** | 9nt | 9nt | **** | **** | **** |
| *MaturePred12* | 96 | **** | **** | 12nt | 12nt | **** | **** | **** |

(b) Average distance distribution of MaturePred0~MaturePred12. *MaturePred0*, *MaturePred2*, …, *MaturePred12* are corresponding to the flanking region sizes (*N*∈{0,2,3,6,9,12}).

| Prediction model | No. of features | 0nt (%) | ±1nt (%) | ±2nt (%) | ±4nt (%) | ±6nt (%) | ±8nt (%) | *E* (nt) | *P* (%) |
| --- | --- | --- | --- | --- | --- | --- | --- | --- | --- |
| *MaturePred0* | 48 | 49.37 | 59.01 | 64.99 | 75.87 | 82.92 | 87.84 | 5.284 | 73.77 |
| *MaturePred2* | 56 | 50.28 | 60.15 | 64.63 | 76.88 | 83.37 | 90.25 | 4.948 | 74.30 |
| *MaturePred3* | 60 | 48.58 | 59.27 | 65.29 | 75.66 | 82.88 | 89.39 | 5.281 | 74.07 |
| *MaturePred6* | 72 | 50.66 | 59.95 | 65.44 | 76.37 | 83.64 | 90.45 | 4.889 | 74.45 |
| *MaturePred9* | 84 | 49.72 | 59.74 | 64.86 | 75.67 | 83.34 | 90.27 | 5.044 | 74.14 |
| *MaturePred12* | 96 | 47.38 | 58.04 | 63.43 | 73.90 | 81.44 | 87.72 | 5.574 | 73.17 |
